# Supplementary material for: Alkyl fluorene-based cross-linkable hole transport materials with high triplet energy for high-efficiency solution-processed green PHOLEDs
Source: Royal Society of Chemistry journal article supplement (doi:10.1039/d3tc01202f), 2023-01-01
Supplement: d3tc01202f1.pdf [file d3tc01202f1.pdf]

## Supplementary Information

### **Alkyl fluorene-based cross-linkable hole transport materials with high triplet energy for high-efficiency solution-processed green PHOLEDs**

Qianqian Li,<sup>a, b</sup> Hongli Liu,<sup>a, b\*</sup> Xianggao Li,<sup>a, b</sup> and Shirong Wang<sup>a, b\*</sup>

<sup>a</sup> School of Chemical Engineering and Technology, Tianjin University, Tianjin 300072, China

<sup>b</sup> Collaborative Innovation Center of Chemical Science and Engineering (Tianjin), Tianjin 300072,  
China

\* E-mail: liuhongli@tju.edu.cn, wangshirong@tju.edu.cn.

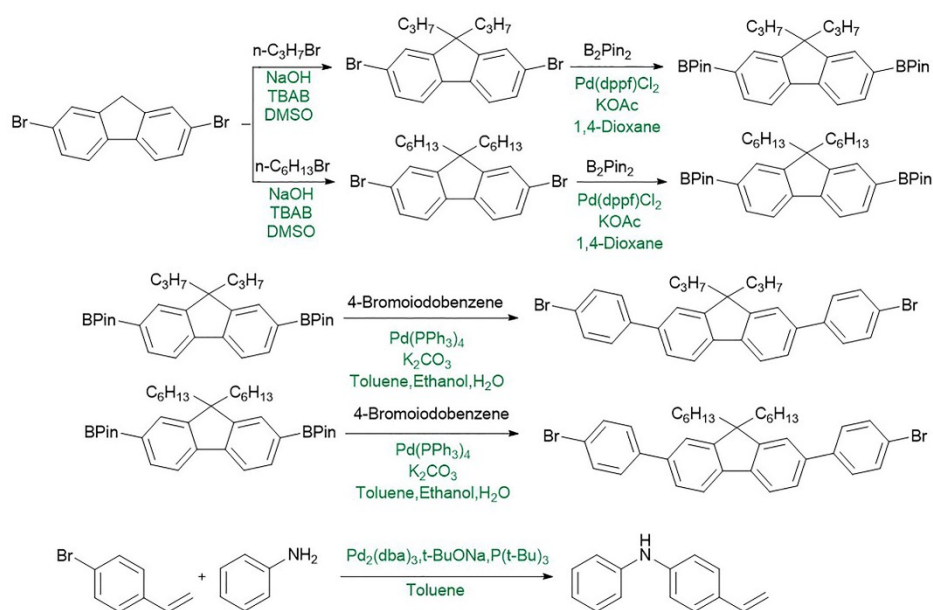

Fig. S1 Synthetic routes and structures of intermediates.

### Synthesis of 2,7-dibromo-9,9-dipropyl-9H-fluorene (1)

2,7-dibromofluorene (3.31 g, 10 mmol), 1-bromopropane (2.04 mL, 22 mmol) and TABA (0.16 g, 0.5 mmol) were dissolved in DMSO (40 mL). The reaction was stirred at room temperature under an inert atmosphere, and 50% NaOH solution was added. After 5 hours of reaction, added appropriate amount of water and extracted with dichloromethane. The solvent was evaporated under reduced pressure and the residue was purified by column chromatography on silica gel eluted with petroleum ether to obtain compound 1 as a white yellowish solid (3.39 g, 75.2%). <sup>1</sup>H NMR (400 MHz, CDCl<sub>3</sub>) δ 7.51 (d, *J* = 8.6 Hz, 2H), 7.45 (d, *J* = 6.7 Hz, 4H), 1.97 – 1.85 (m, 4H), 0.73 – 0.60 (m, 10H).

### Synthesis of 2,2'-(9,9-dipropyl-9H-fluorene-2,7-diyl)bis(4,4,5,5-tetramethyl-1,3,2-dioxaborane) (2)

Compound 1 (2.25 g, 5 mmol), binaryl borate (5.18 g, 20 mmol), potassium acetate (3.97 g, 40 mmol), PdCl<sub>2</sub>(dppf) (0.392 g, 0.525 mmol) were dissolved in 1, 4-dioxane (40 mL). The mixture was reacted at 80 °C for 10 hours under an inert atmosphere. After cooling to room temperature, water was added to quench the reaction and the mixture was extracted with dichloromethane. The solvent was evaporated under

reduced pressure and the residue was purified by column chromatography on silica gel eluted with petroleum ether/dichloromethane (20:1) to obtain compound 2 as a white crystal (2.64 g, 98%). <sup>1</sup>H NMR (400 MHz, CDCl<sub>3</sub>) δ 7.80 (d, *J* = 8.4 Hz, 2H), 7.77 – 7.69 (m, 4H), 1.99 (s, 4H), 1.39 (s, 24H), 0.63 (s, 10H).

### **Synthesis of 2,7-bis(4-bromophenyl)-9,9-dipropyl-9H-fluorene (3)**

Compound 2 (1.63 g, 3 mmol), 4-bromoiodobenzene (1.91 g, 6.6 mmol), anhydrous potassium carbonate (1.26 g, 9 mmol), Pd(PPh<sub>3</sub>)<sub>4</sub> (0.3 mmol, 0.35 g) and toluene-ethanol-water (30 mL, 15 mL, 15 mL) were added to a two-necked round bottom flask respectively. The mixture was stirred and reacted at 115 °C for 48 hours under an inert atmosphere. After cooling to room temperature, water was added to quench the reaction and the mixture was extracted with dichloromethane. The solvent was evaporated under reduced pressure and the residue was purified by column chromatography on silica gel eluted with petroleum ether to obtain compound 3 as a white crystal (1.02 g, 56.5%). <sup>1</sup>H NMR (400 MHz, CDCl<sub>3</sub>) δ 8.21 (d, *J* = 8.3 Hz, 4H), 8.07 (d, *J* = 7.3 Hz, 2H), 7.86 (d, *J* = 8.5 Hz, 4H), 7.55 (s, 6H), 7.39 (dd, *J* = 19.3, 7.6 Hz, 10H), 7.20 (d, *J* = 4.3 Hz, 8H), 7.11 (s, 4H), 6.93 (d, *J* = 6.7 Hz, 2H), 6.74 – 6.52 (m, 2H), 5.59 (d, *J* = 14.7 Hz, 2H), 5.10 (d, *J* = 10.8 Hz, 2H), 2.07 (s, 4H), 1.14 (s, 12H), 0.96 (s, 4H), 0.79 (s, 6H).

### **Synthesis of *N*-phenyl-4-vinyl aniline (4)**

Sodium tert-butoxide (2.94 g, 30 mmol), Pd<sub>2</sub>(dba)<sub>3</sub> (0.28 g, 0.3 mmol), aniline (1.1 mL, 12 mmol), p-bromostyrene (1.31 mL, 10 mmol), tert-butyl phosphorus (toluene solution) (1.49 mL, 0.73 mmol) and toluene (60 mL) were added to a two-necked round bottom flask respectively. The mixture was stirred and reacted at 90 °C for 10 hours under an inert atmosphere. After cooling to room temperature, water was added to quench the reaction and the mixture was extracted with ethyl acetate. The solvent was evaporated under reduced pressure and the residue was purified by column chromatography on Al<sub>2</sub>O<sub>3</sub> eluted with petroleum ether/ethyl acetate (70:1) to obtain compound 4 as a white solid (1.38g, 70.9%). <sup>1</sup>H NMR (400 MHz, DMSO) δ 8.27 (s, 1H), 7.33 (d, *J* = 8.5 Hz, 2H), 7.24 (t, *J* = 7.9 Hz, 2H), 7.09 (d, *J* = 7.7 Hz, 2H), 7.03 (d,

$J = 8.5$  Hz, 2H), 6.84 (t,  $J = 7.3$  Hz, 1H), 6.63 (dd,  $J = 17.6, 10.9$  Hz, 1H), 5.61 (d,  $J = 18.4$  Hz, 1H), 5.06 (d,  $J = 10.9$  Hz, 1H).

**Synthesis of 4,4'-(9,9-dipropyl-9H-fluorene-2,7-diyl)bis(*N*-phenyl-*N*-(4-vinylphenyl) aniline) (5)**

Compound 3 (0.90 g, 1.5 mmol), compound 4 (0.64 g, 3.3 mmol), Sodium tert-butoxide (0.44 g, 4.5 mmol),  $\text{Pd}_2(\text{dba})_3$  (0.05 g, 0.045 mmol), tri-tert-butyl phosphine (toluene solution) (0.24 mL, 0.12 mmol) and toluene (40 mL) were added to a two-necked round bottom flask respectively. The mixture was stirred and reacted at 90 °C for 16 hours under an inert atmosphere. After cooling to room temperature, water was added to quench the reaction and the mixture was extracted with ethyl acetate. The solvent was evaporated under reduced pressure and the residue was purified by column chromatography on  $\text{Al}_2\text{O}_3$  eluted with petroleum ether/EtOAc (100:1) to obtain compound 5 as a white solid (0.78 g, 65.5%).  $^1\text{H}$  NMR (400 MHz,  $\text{CDCl}_3$ )  $\delta$  7.74 (d,  $J = 8.4$  Hz, 1H), 7.62 – 7.53 (m, 4H), 7.35 – 7.26 (m, 4H), 7.18 (t,  $J = 8.0$  Hz, 4H), 7.13 – 6.99 (m, 3H), 6.69 (dd,  $J = 17.6, 10.9$  Hz, 1H), 5.67 (d,  $J = 17.6$  Hz, 1H), 5.18 (d,  $J = 11.0$  Hz, 1H), 2.02 (dd,  $J = 9.6, 5.7$  Hz, 2H), 0.75 (dt,  $J = 12.7, 6.1$  Hz, 2H), 0.68 (t,  $J = 6.5$  Hz, 3H).  $^{13}\text{C}$  NMR (151 MHz,  $\text{CDCl}_3$ )  $\delta$  151.71, 147.63, 147.47, 146.95, 139.90, 139.51, 136.38, 136.03, 132.25, 129.48, 127.97, 127.27, 125.70, 124.71, 124.39, 123.92, 123.25, 121.11, 120.06, 112.36, 55.58, 42.99, 17.32, 14.58.

**Synthesis of 2,7-dibromo-9,9-dihexyl-9H-fluorene (6)**

2,7-dibromofluorene (2.32 g, 7 mmol), 1-bromohexane (2.18 mL, 15.4 mmol) and TBAB (0.12 g, 0.35 mmol) were dissolved in DMSO (40 mL). The reaction was stirred at room temperature under an inert atmosphere, and 50% NaOH solution was added. After 5 hours of reaction, added appropriate amount of water and extracted with dichloromethane. The solvent was evaporated under reduced pressure and the residue was purified by column chromatography on silica gel eluted with petroleum ether to obtain compound 6 as a white yellowish solid (2.68g, 77.8%).  $^1\text{H}$  NMR (400 MHz,  $\text{CDCl}_3$ )  $\delta$  7.74 (d,  $J = 8.4$  Hz, 1H), 7.62 – 7.53 (m, 4H), 7.35 – 7.26 (m, 4H), 7.18 (t,  $J = 8.0$  Hz, 4H), 7.13 – 6.99 (m, 3H), 6.69 (dd,  $J = 17.6, 10.9$  Hz, 1H), 5.67 (d,  $J = 17.6$

Hz, 1H), 5.18 (d,  $J = 11.0$  Hz, 1H), 2.02 (dd,  $J = 9.6, 5.7$  Hz, 2H), 0.75 (dt,  $J = 12.7, 6.1$  Hz, 2H), 0.68 (t,  $J = 6.5$  Hz, 3H).

**Synthesis of 2,2'-(9,9-dihexyl-9H-fluorene-2,7-diyl)bis(4,4,5,5-tetramethyl-1,3,2-dioxaborane) (7)**

Compound 6 (2.46 g, 5 mmol), binaryl borate (5.18 g, 20 mmol), potassium acetate (3.97 g, 40 mmol),  $\text{PdCl}_2(\text{dppf})$  (0.392 g, 0.525 mmol) were dissolved in 1, 4-dioxane (40 mL). The mixture was reacted at 80 °C for 10 hours under an inert atmosphere. After cooling to room temperature, water was added to quench the reaction and the mixture was extracted with dichloromethane. The solvent was evaporated under reduced pressure and the residue was purified by column chromatography on silica gel eluted with petroleum ether/ $\text{CH}_2\text{Cl}_2$  (20:1) to obtain compound 7 as a white crystal (2.87 g, 98%).  $^1\text{H}$  NMR (400 MHz,  $\text{CDCl}_3$ )  $\delta$  7.81 (d,  $J = 7.5$  Hz, 2H), 7.76 – 7.70 (m, 4H), 2.04 – 1.95 (m, 4H), 1.39 (s, 24H), 1.11 – 0.97 (m, 12H), 0.74 (t,  $J = 7.1$  Hz, 6H), 0.60 – 0.49 (m, 4H).

**Synthesis of 2,7-bis(4-bromophenyl)-9,9-dihexyl-9H-fluorene (8)**

Compound 7 (1.76 g, 3 mmol), 4-bromoiodobenzene (1.91 g, 6.6 mmol), anhydrous potassium carbonate (1.26 g, 9 mmol),  $\text{Pd}(\text{PPh}_3)_4$  (0.3 mmol, 0.35 g) and toluene-ethanol-water (30 mL, 15 mL, 15 mL) were added to a two-necked round bottom flask respectively. The mixture was stirred and reacted at 115 °C for 48 hours under an inert atmosphere. After cooling to room temperature, water was added to quench the reaction and the mixture was extracted with dichloromethane. The solvent was evaporated under reduced pressure and the residue was purified by column chromatography on silica gel eluted with petroleum ether to obtain compound 8 as a white crystal (1.08 g, 56.1%).  $^1\text{H}$  NMR (400 MHz,  $\text{CDCl}_3$ )  $\delta$  8.21 (d,  $J = 8.3$  Hz, 4H), 8.07 (d,  $J = 7.3$  Hz, 2H), 7.86 (d,  $J = 8.5$  Hz, 4H), 7.55 (s, 6H), 7.47 – 7.31 (m, 10H), 7.20 (d,  $J = 4.3$  Hz, 8H), 7.11 (s, 4H), 6.93 (d,  $J = 5.9$  Hz, 2H), 6.76 – 6.56 (m, 2H), 5.59 (d,  $J = 18.0$  Hz, 2H), 5.10 (d,  $J = 12.3$  Hz, 2H), 2.05 (s, 4H), 1.14 (s, 12H), 0.95 (s, 4H), 0.78 (d,  $J = 6.3$  Hz, 6H).

**Synthesis of 4,4'-(9,9-dihexyl-9H-fluorene-2,7-diyl)bis(*N*-phenyl-*N*-(4-vinylphenyl) aniline) (9)**

Compound 8 (0.97 g, 1.5 mmol), compound 4 (0.64 g, 3.3 mmol), sodium tert-butoxide (0.44 g, 4.5 mmol), Pd<sub>2</sub>(dba)<sub>3</sub> (0.05 g, 0.045 mmol), tri-tert-butyl phosphine (toluene solution) (0.24 mL, 0.12 mmol) and toluene (40 mL) were added to a two-necked round bottom flask respectively. The mixture was stirred and reacted at 90 °C for 16 hours under an inert atmosphere. After cooling to room temperature, water was added to quench the reaction and the mixture was extracted with ethyl acetate. The solvent was evaporated under reduced pressure and the residue was purified by column chromatography on Al<sub>2</sub>O<sub>3</sub> eluted with petroleum ether/EtOAc (100:1) to obtain compound 9 as a white solid (0.8 g, 61.2%). <sup>1</sup>H NMR (400 MHz, CDCl<sub>3</sub>) δ 8.21 (d, J = 8.3 Hz, 4H), 8.07 (d, J = 7.3 Hz, 2H), 7.86 (d, J = 8.5 Hz, 4H), 7.55 (s, 6H), 7.47 – 7.31 (m, 10H), 7.20 (d, J = 4.3 Hz, 8H), 7.11 (d, J = 3.9 Hz, 4H), 6.93 (d, J = 6.7 Hz, 2H), 6.76 – 6.56 (m, 2H), 5.59 (d, J = 17.0 Hz, 2H), 5.10 (d, J = 8.8 Hz, 2H), 2.07 (s, 4H), 1.14 (s, 12H), 0.96 (s, 4H), 0.78 (d, J = 6.3 Hz, 6H). <sup>13</sup>C NMR (151 MHz, CDCl<sub>3</sub>) δ 151.88, 147.64, 147.48, 146.93, 139.81, 139.47, 136.38, 136.11, 132.28, 129.45, 127.92, 127.27, 125.65, 124.71, 124.45, 123.97, 123.29, 121.07, 120.05, 112.42, 55.34, 40.66, 31.63, 29.83, 23.94, 22.67, 14.22.

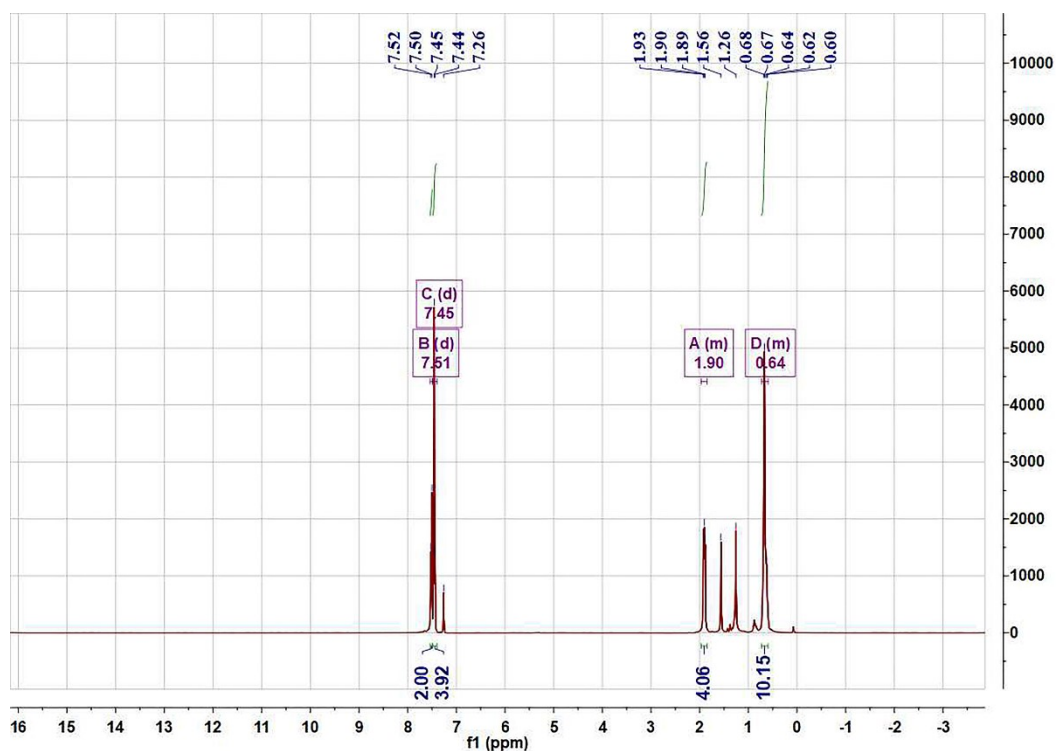

**Fig. S2** <sup>1</sup>H NMR spectra of 2,7-dibromo-9,9-dipropyl-9H-fluorene.

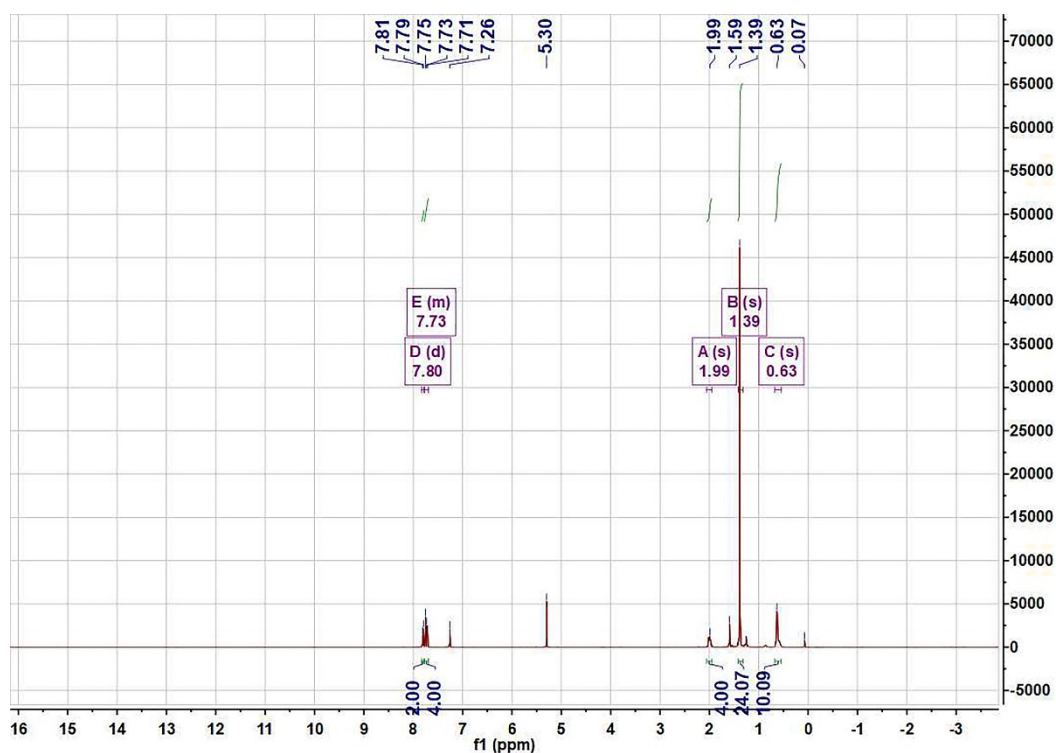

**Fig. S3** <sup>1</sup>H NMR spectra of 2,2'-(9,9-dipropyl-9H-fluorene-2,7-diyl)bis(4,4,5,5-tetramethyl-1,3,2-dioxaborane).

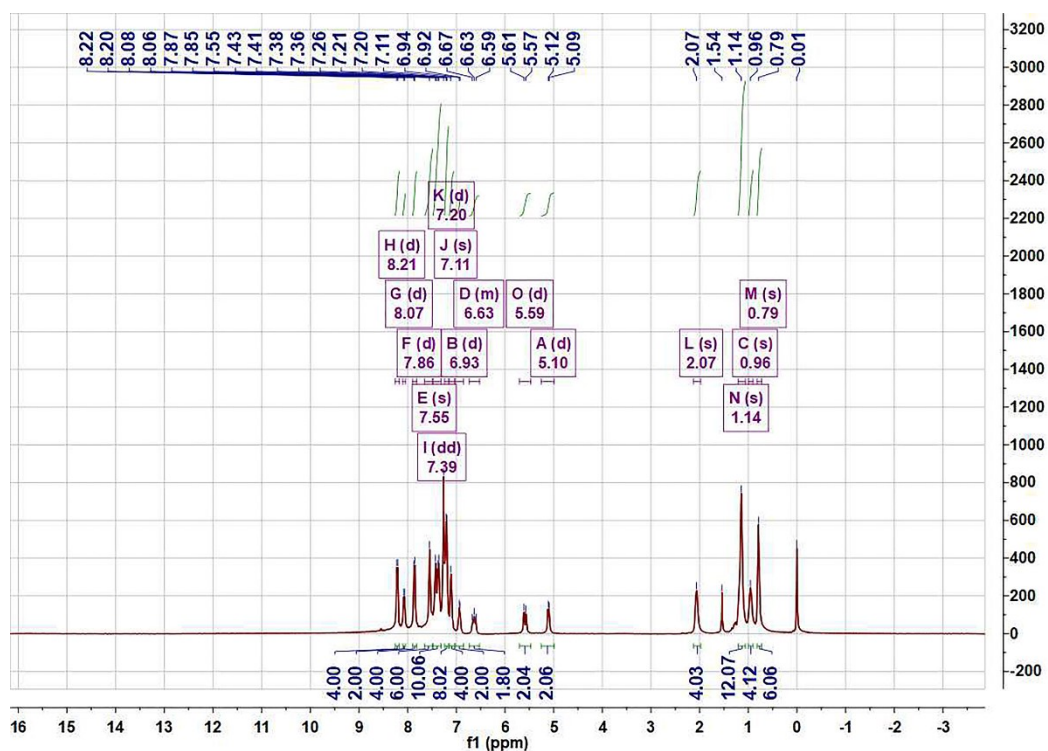

Fig. S4  $^1\text{H}$  NMR spectra of 2,7-bis(4-bromophenyl)-9,9-dipropyl-9H-fluorene.

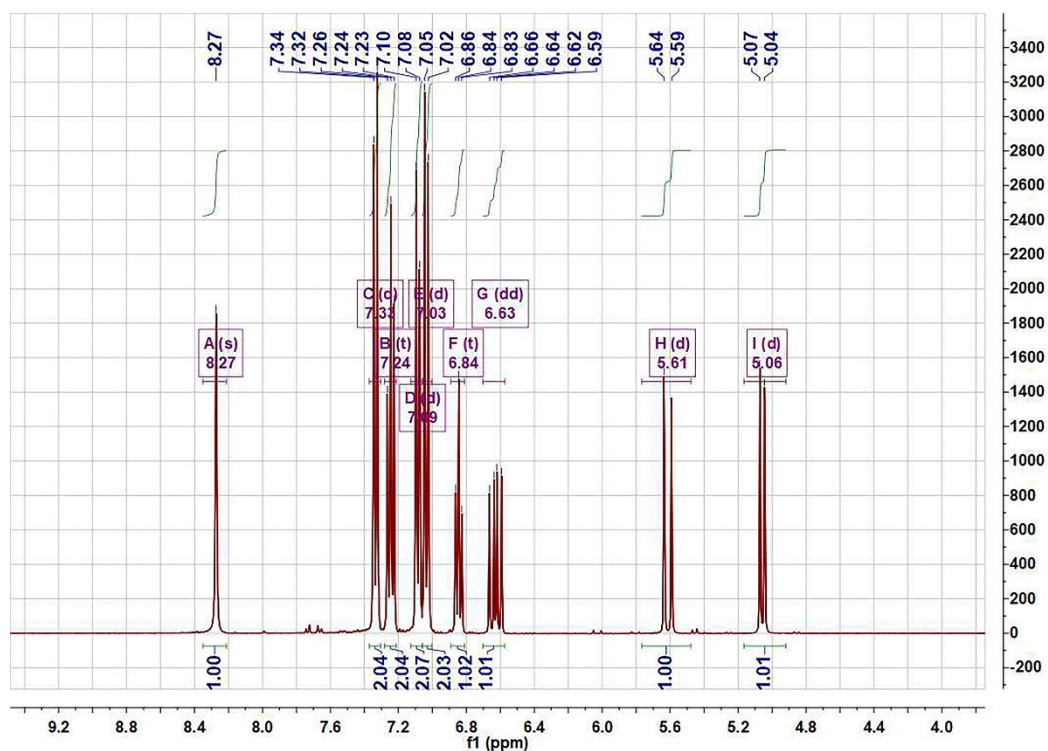

Fig. S5  $^1\text{H}$  NMR spectra of *N*-phenyl-4-vinyl aniline.

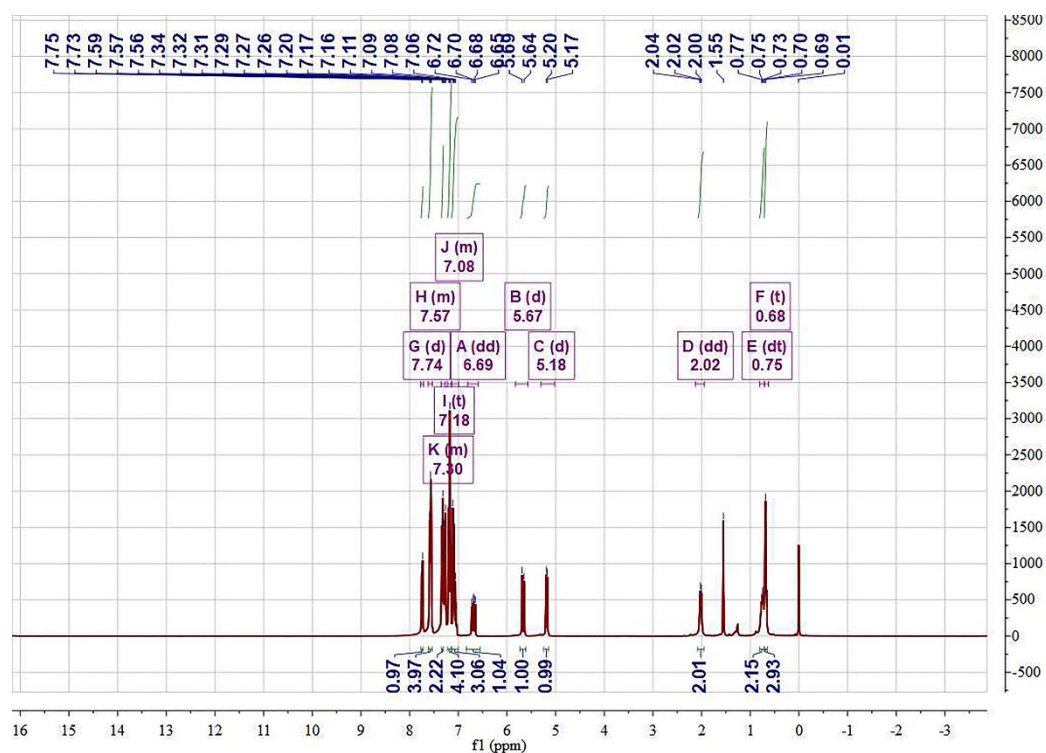

**Fig. S6**  $^1\text{H}$  NMR spectra of 4,4'-(9,9-dipropyl-9H-fluorene-2,7-diyl)bis(*N*-phenyl-*N*-(4-vinylphenyl) aniline).

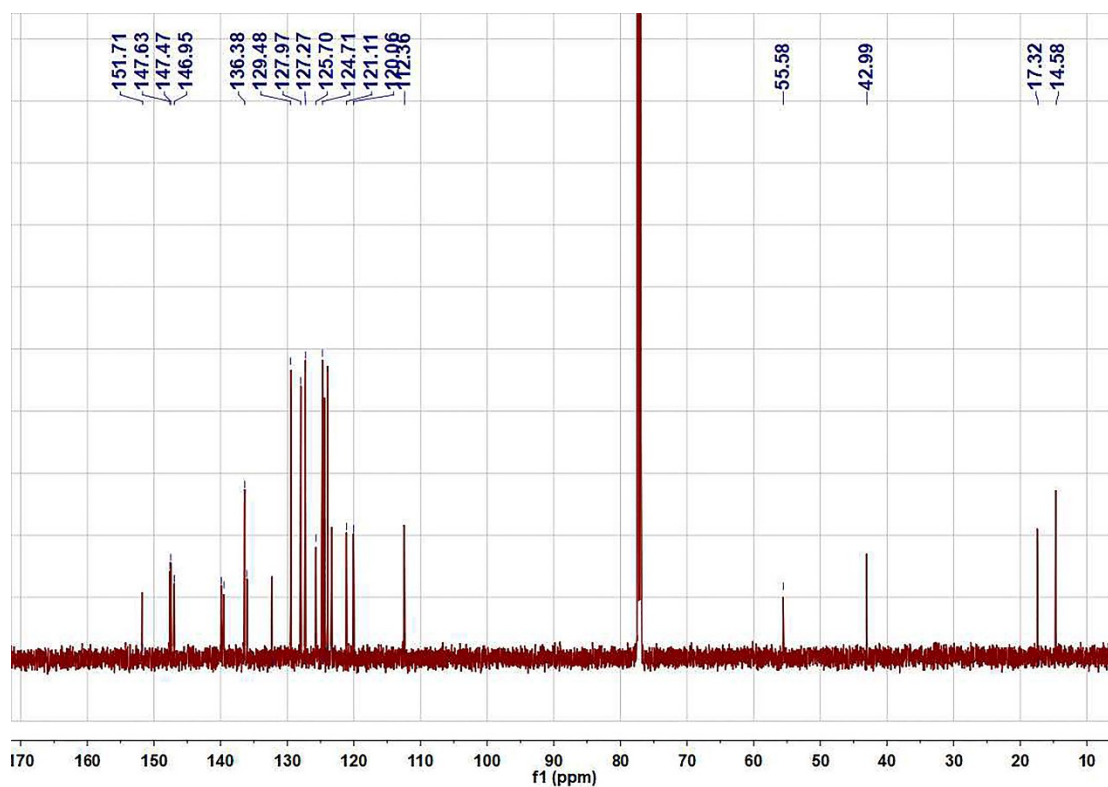

**Fig. S7**  $^{13}\text{C}$  NMR spectra of 4,4'-(9,9-dipropyl-9H-fluorene-2,7-diyl)bis(*N*-phenyl-*N*-(4-vinylphenyl)aniline).

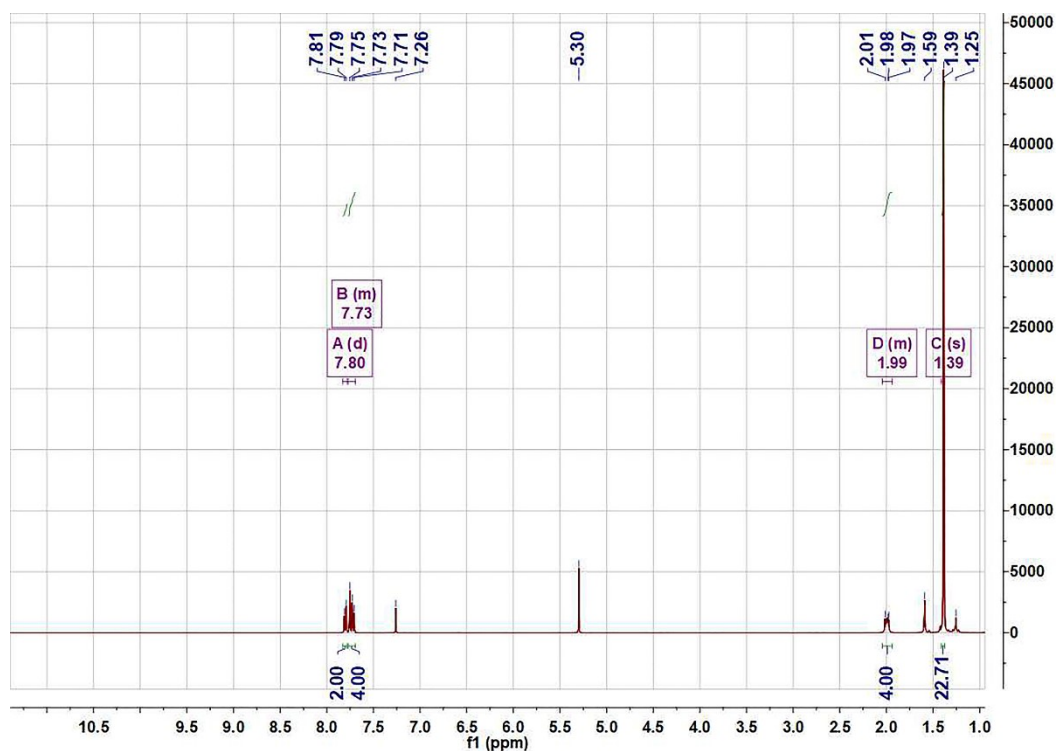

**Fig. S8** <sup>1</sup>H NMR spectra of 2,7-dibromo-9,9-dihexyl-9H-fluorene.

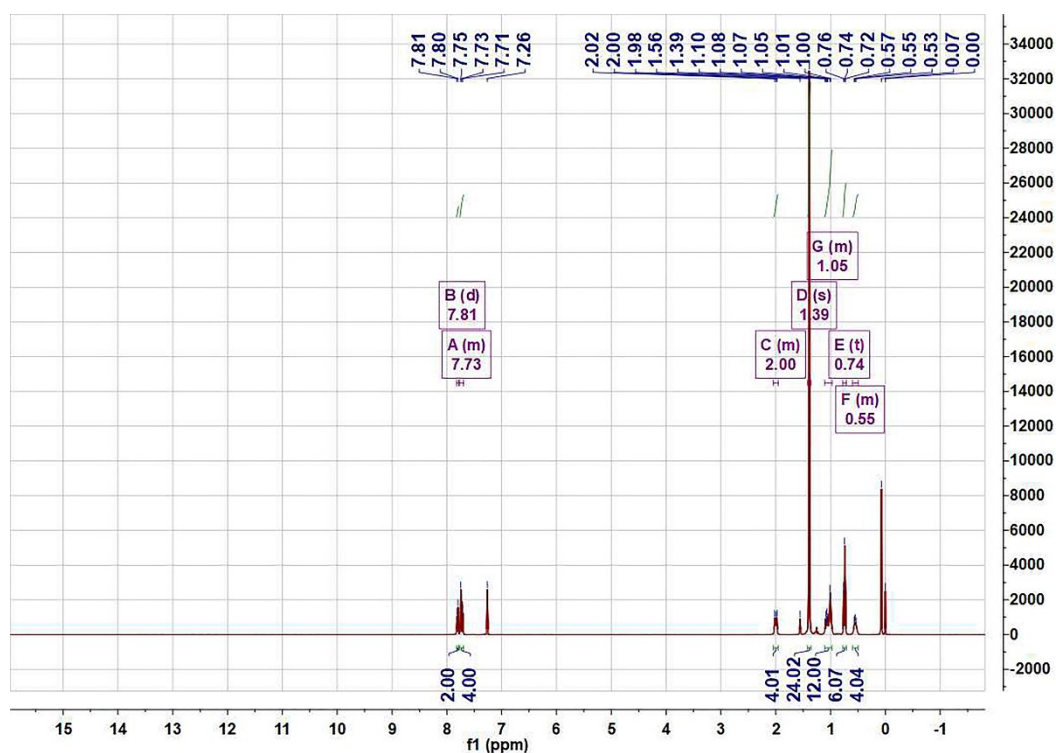

**Fig. S9** <sup>1</sup>H NMR spectra of 2,2'-(9,9-dihexyl-9H-fluorene-2,7-diyl)bis(4,4,5,5-tetramethyl-1,3,2-dioxaborane).

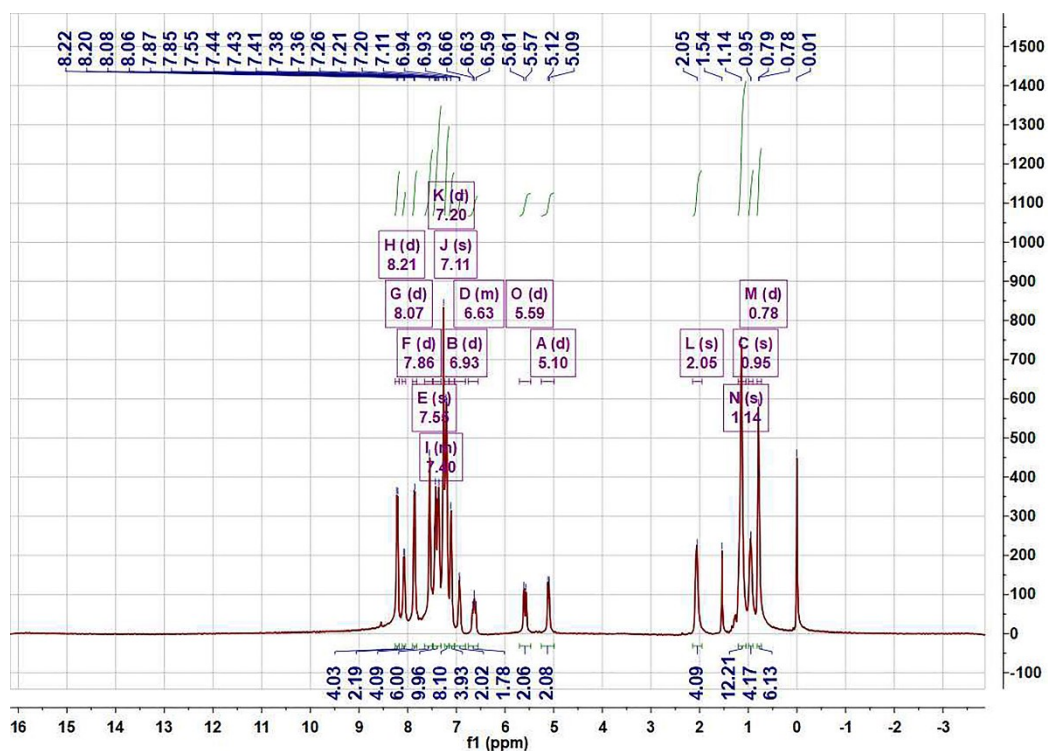

**Fig. S10**  $^1\text{H}$  NMR spectra of 2,7-bis(4-bromophenyl)-9,9-dihexyl-9H-fluorene.

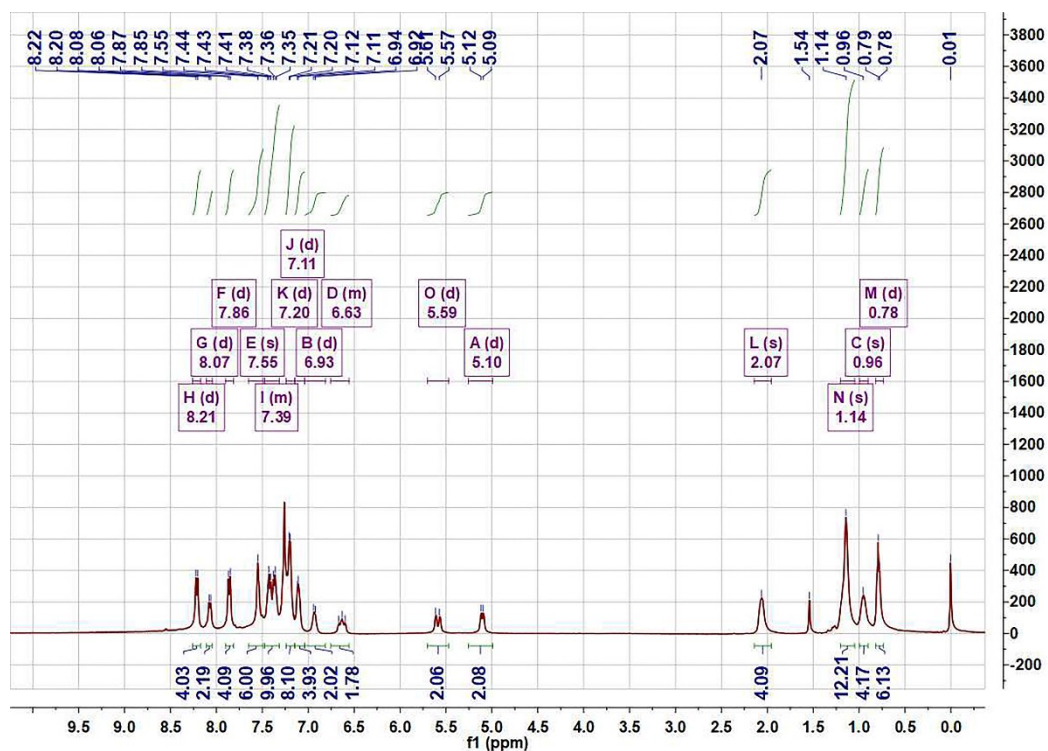

**Fig. S11**  $^1\text{H}$  NMR spectra of 4,4'-(9,9-dipropyl-9H-fluorene-2,7-diyl)bis(*N*-phenyl-*N*-(4-vinylphenyl)aniline).

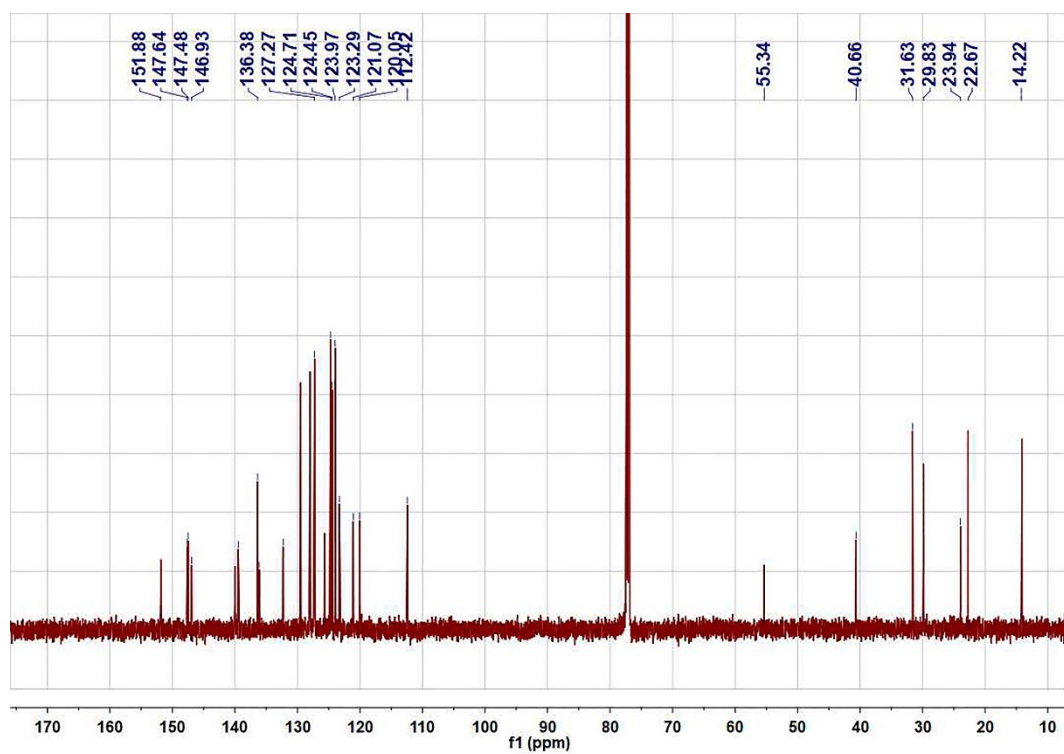

**Fig. S12**  $^1\text{H}$  NMR spectra of 4,4'-(9,9-dipropyl-9H-fluorene-2,7-diyl)bis(*N*-phenyl-*N*-(4-vinylphenyl)aniline).

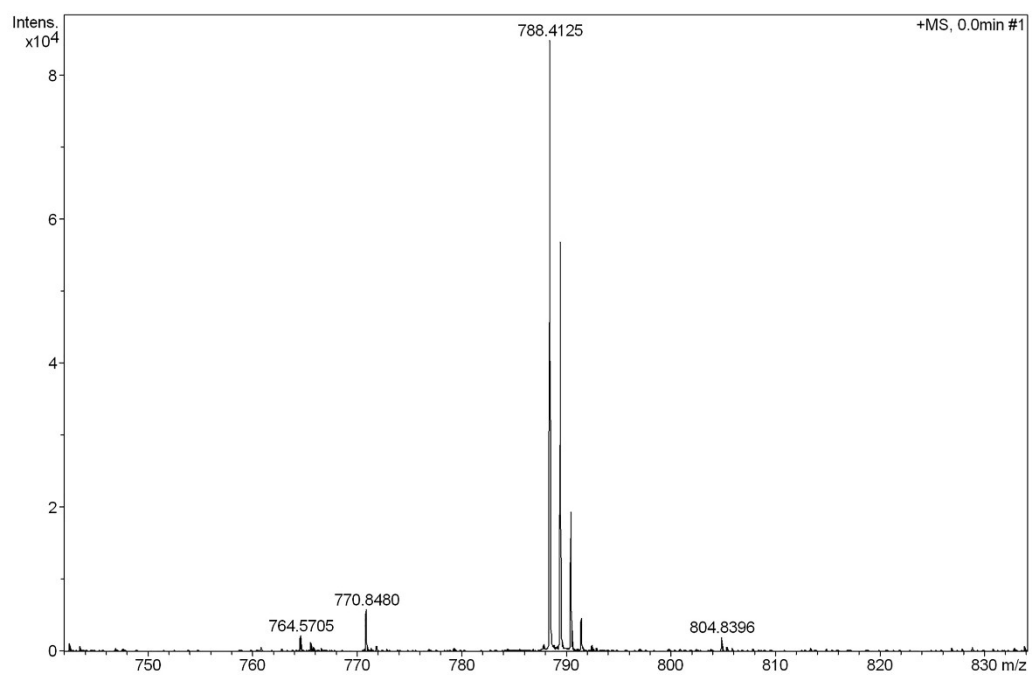

**Fig. S13** Mass spectra of 4,4'-(9,9-dipropyl-9H-fluorene-2,7-diyl)bis(*N*-phenyl-*N*-(4-vinylphenyl)aniline).

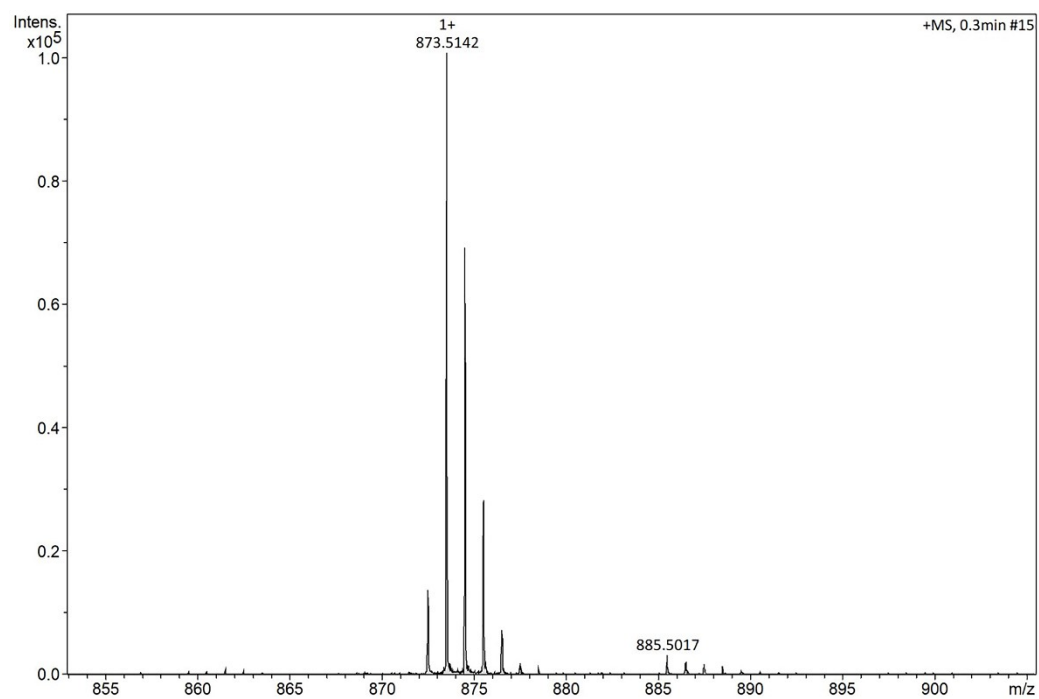

**Fig. S14** Mass spectrum of 4,4'-(9,9-dipropyl-9H-fluorene-2,7-diyl)bis(*N*-phenyl-*N*-(4-vinylphenyl)aniline).

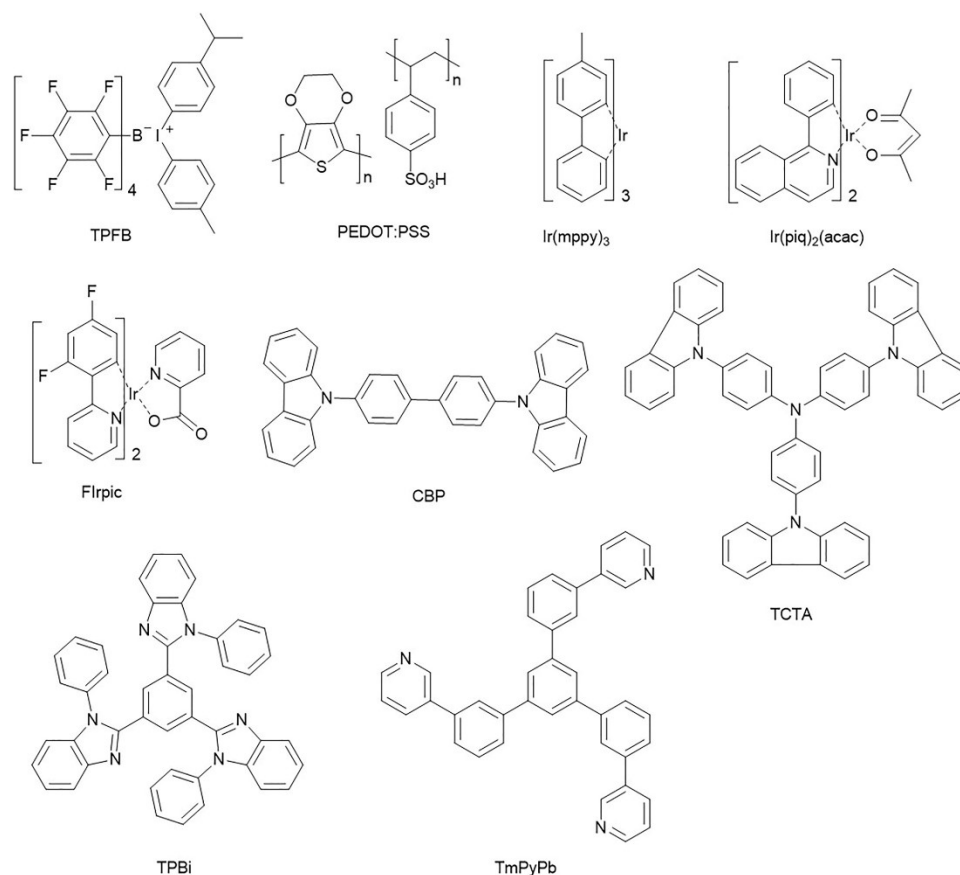

**Fig. S15** The structures of 4-isopropyl-4'-methyldiphenyliodonium tetrakis(pentafluorophenyl)borate (TPFB), poly(3,4-ethylenediothiophene):poly(styrene sulfonate) (PEDOT:PSS), tris[2-(*p*-tolyl)pyridine]iridium(III) (Ir(mppy)<sub>3</sub>), bis(1-phenyl-isoquinoline)(acetylacetonato)iridium(III) (Ir(piq)<sub>2</sub>(acac)), bis(4,6-difluorophenylpyridine)(picolinate)iridium(III) (Flrpic), 4,4'-di(9*H*-carbazol-9-yl)-1,1'-biphenyl (CBP), tris(4-carbazolyl-9-ylphenyl)amine (TCTA), 2,2',2''-(1,3,5-benzinetriyl)-tris(1-phenyl-1-*H*-benzimidazole) (TPBi) and 1,3,5-tri(*m*-pyrid-3-yl-phenyl)benzene (TmPyPb).

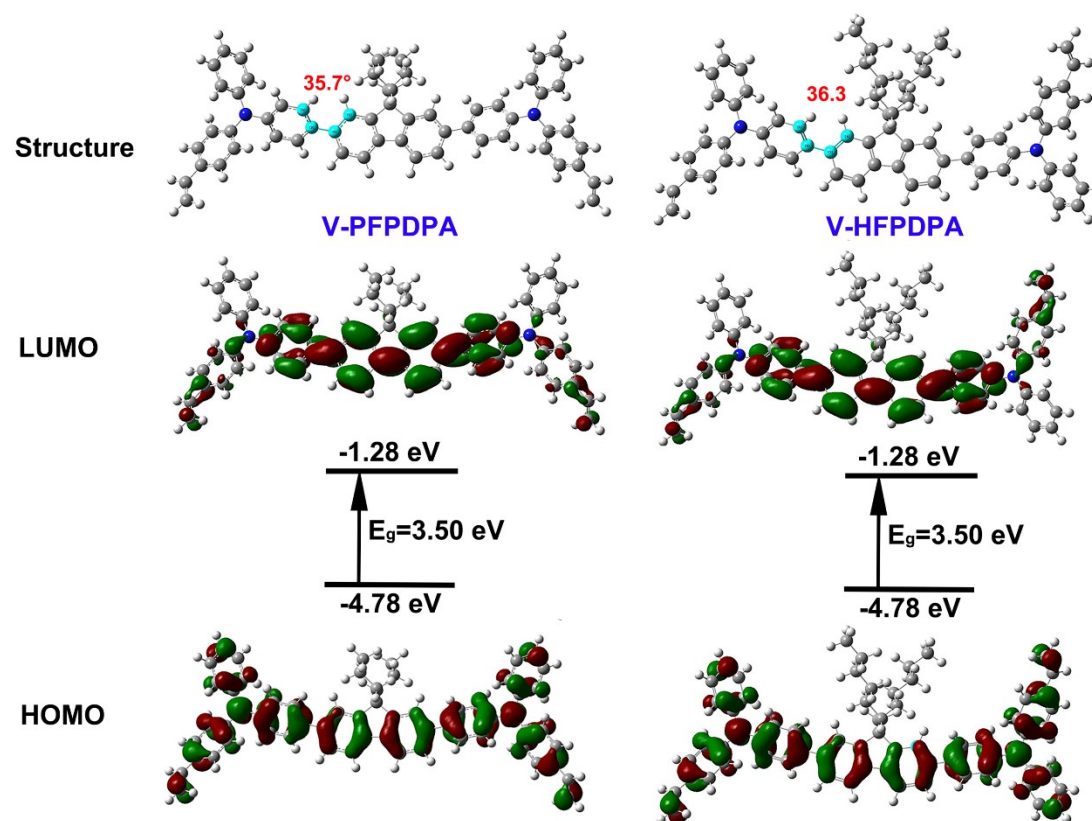

**Fig. S16** HOMO and LUMO energy levels and distribution of V-PFPDPA and V-HFPDPA.

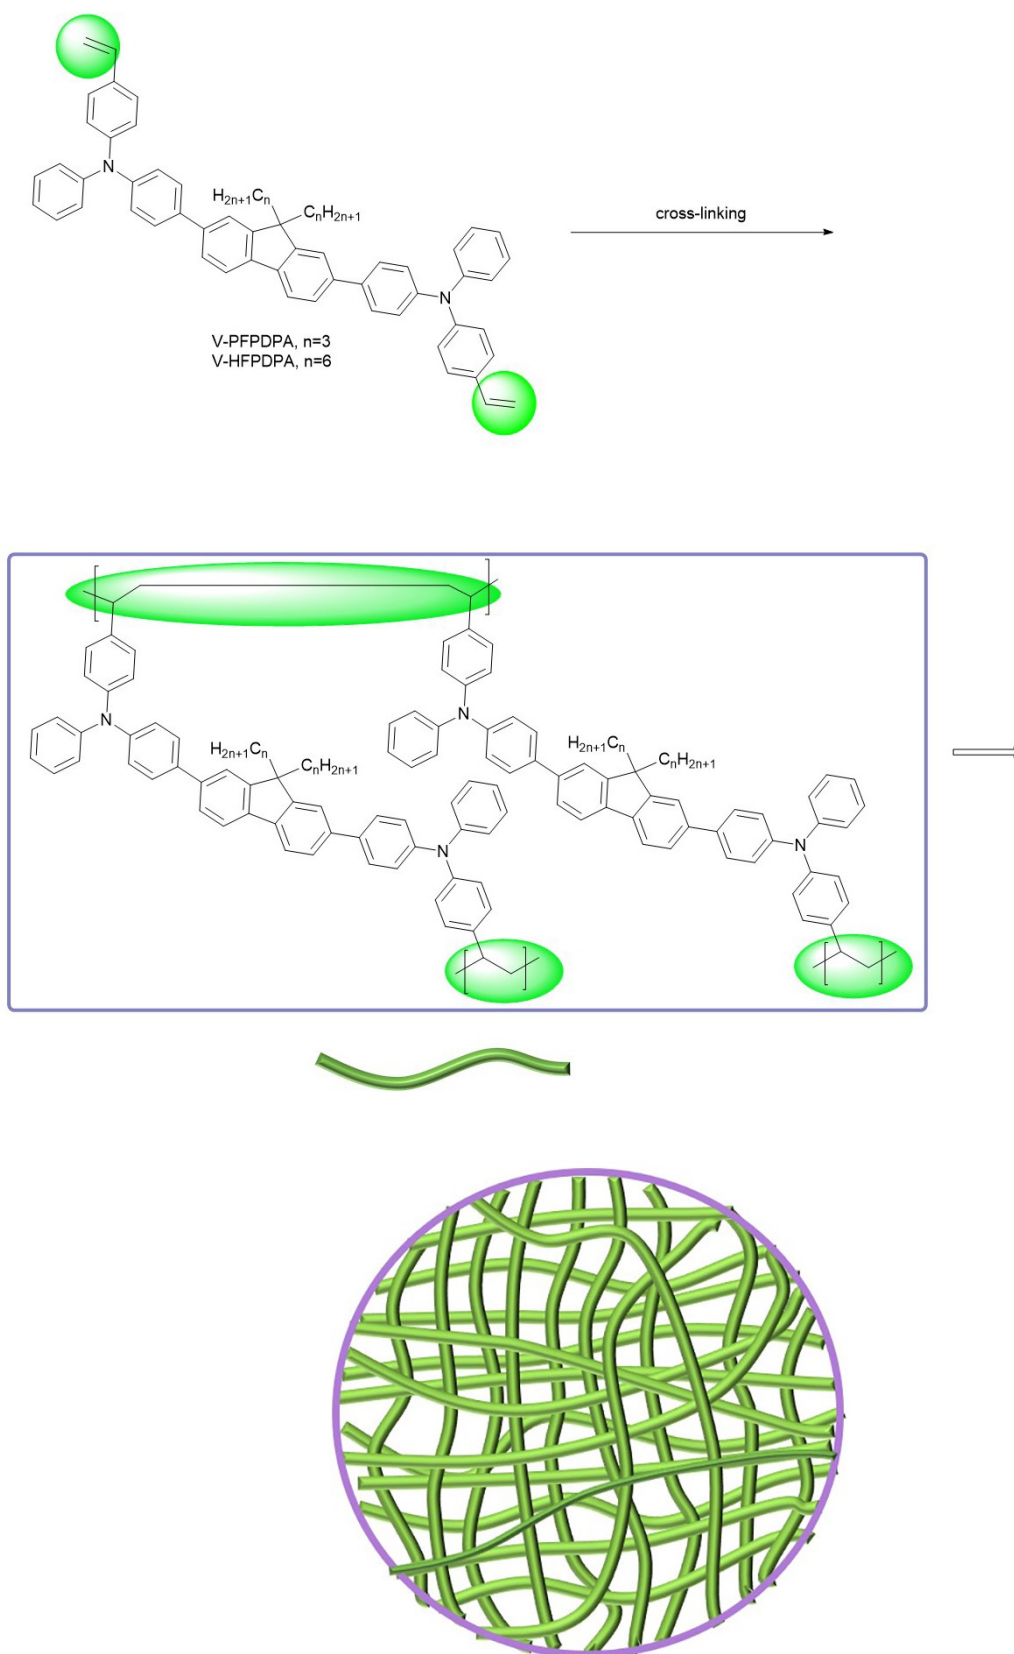

**Fig. S17** Schematic diagram of the formation of cross-linked films.

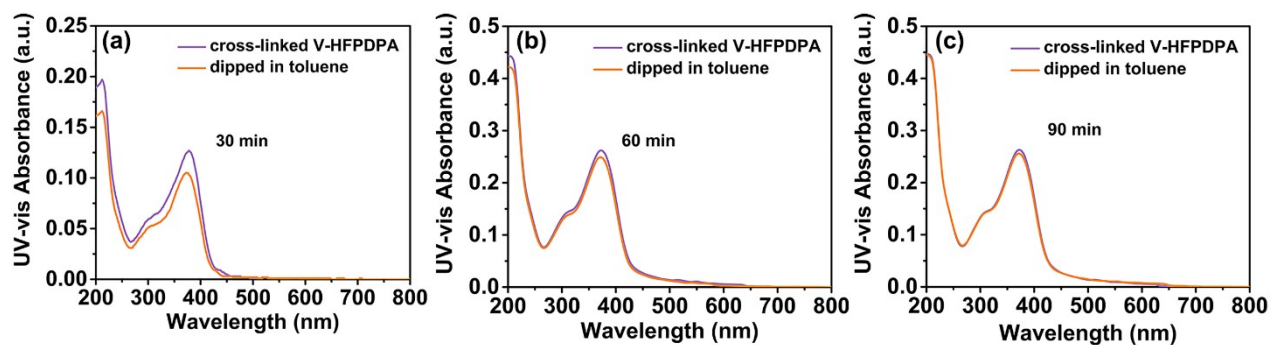

**Fig. S18** The UV-vis absorption spectra of V-HFPDPA films heated at 160 °C for (a) 30 min, 60 min and (c) 90 min before and after immersion in toluene.

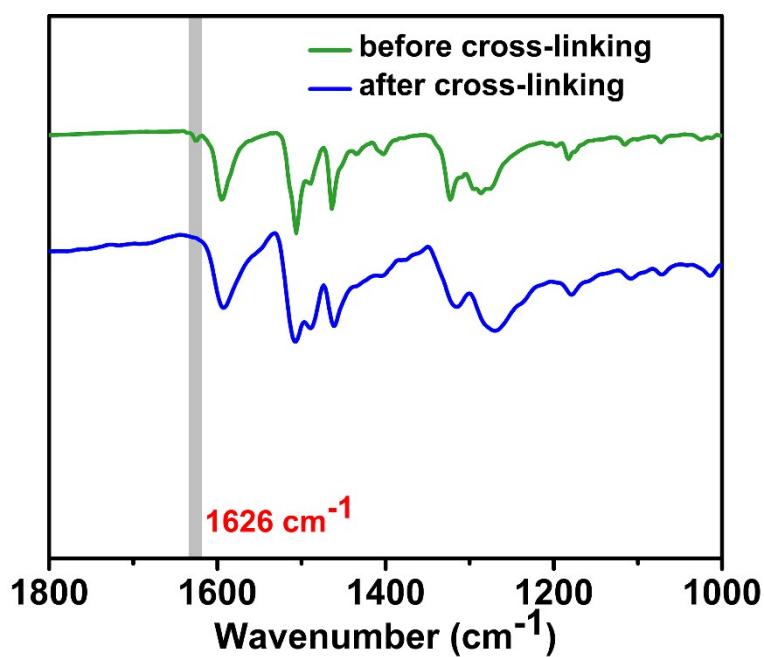

**Fig. S19** FT-IR spectra of V-PFPDPA film and cross-linked V-PFPDPA film.

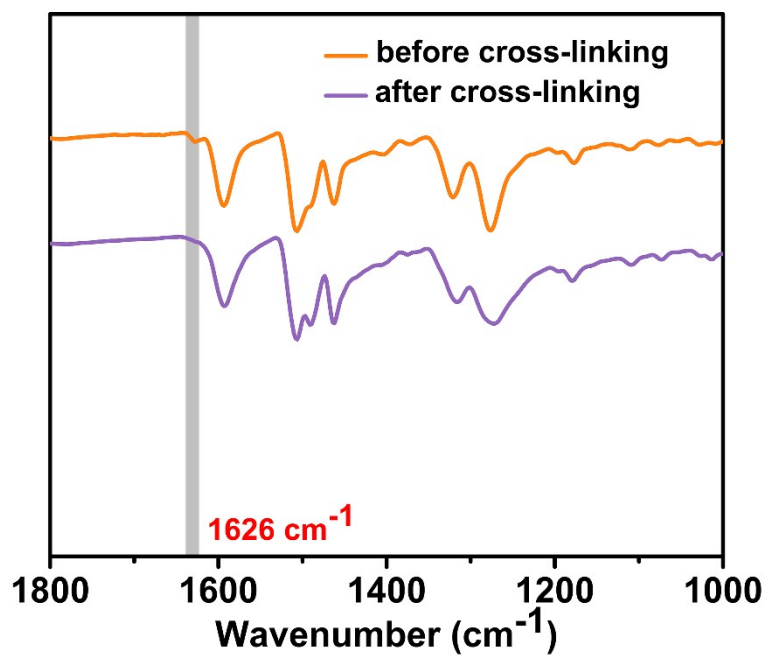

**Fig. S20** FT-IR spectra of V-HFPDPA film and cross-linked V-HFPDPA film.

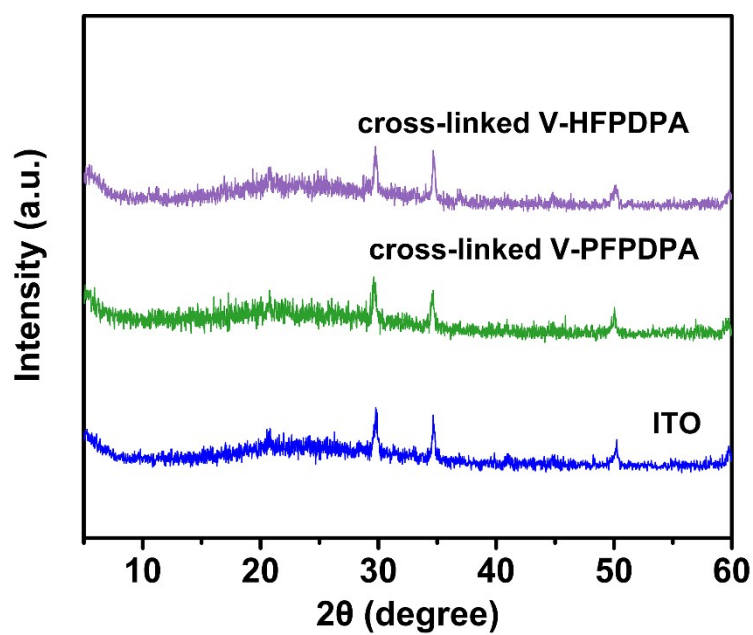

**Fig. S21** X-ray diffraction spectra of ITO substrate, cross-linked V-PFPDPA film, and cross-linked V-HFPDPA film on ITO substrate after annealing at  $200^\circ\text{C}$  for 30 min.

**Table S1** Zero-field hole mobility of doped and undoped HTLs

| HTLs                            | Zero-field hole mobility ( $\text{cm}^2\text{V}^{-1}\text{s}^{-1}$ ) |
|---------------------------------|----------------------------------------------------------------------|
| V-PFPDPA / V-HFPDPA             | $1.48 \times 10^{-5} / 2.82 \times 10^{-5}$                          |
| V-PFPDPA / V-HFPDPA:1 wt%TPFB   | $1.74 \times 10^{-4} / 4.63 \times 10^{-4}$                          |
| V-PFPDPA / V-HFPDPA:2.5 wt%TPFB | $2.49 \times 10^{-3} / 3.48 \times 10^{-3}$                          |
| V-PFPDPA / V-HFPDPA:5 wt%TPFB   | $6.74 \times 10^{-2} / 2.47 \times 10^{-1}$                          |

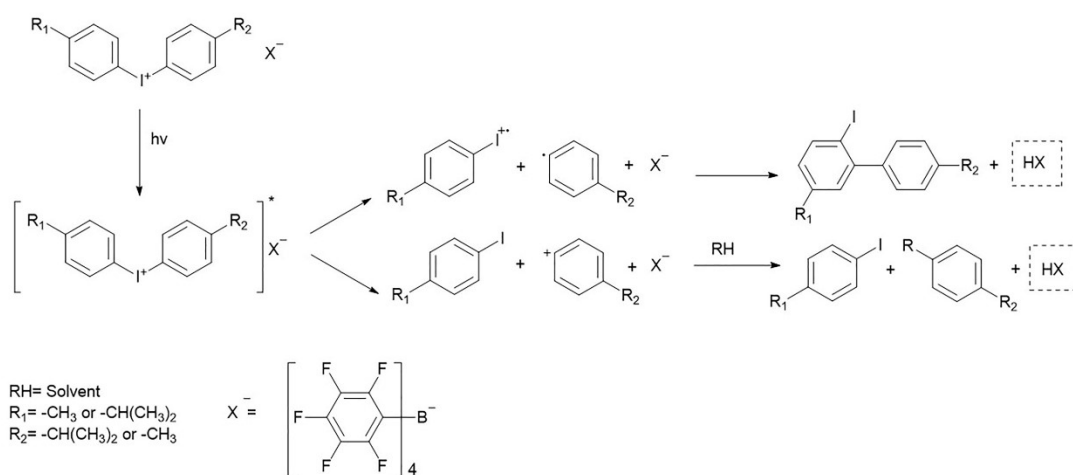**Fig. S22** Mechanism for the generation of hydrogen tetrakis(pentafluorophenyl)borate.

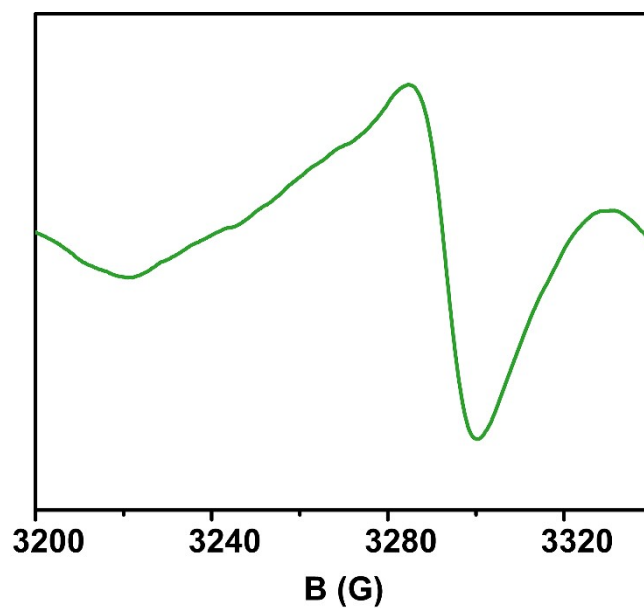

**Fig. S23** EPR spectrum of V-HFPDPA: 30 wt% TPFB.

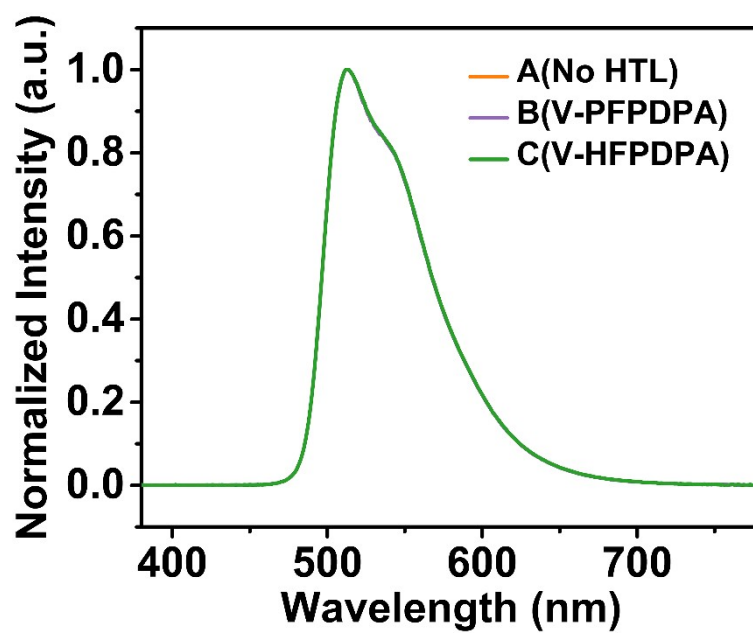

**Fig. S24** Normalized EL spectra of green PHOLEDs.

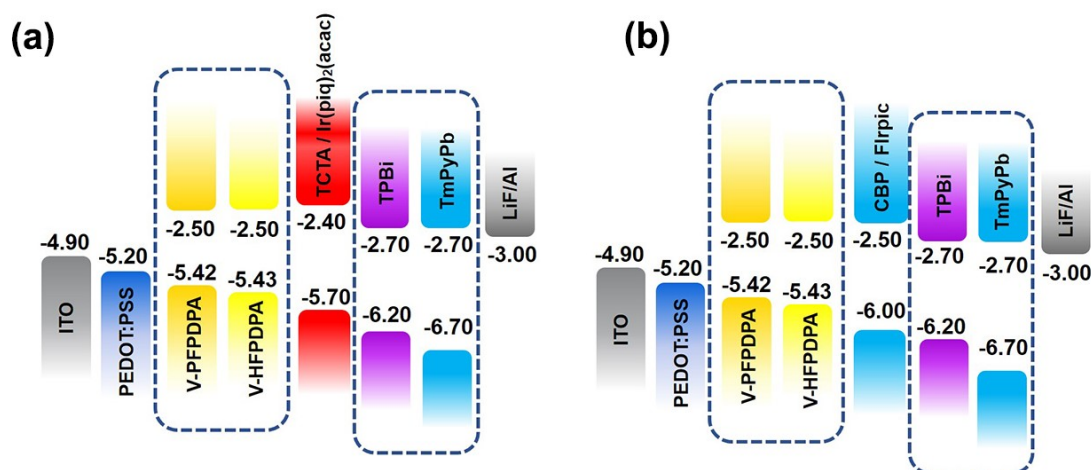

Fig. S25 Energy level diagram of red and blue PHOLEDs.

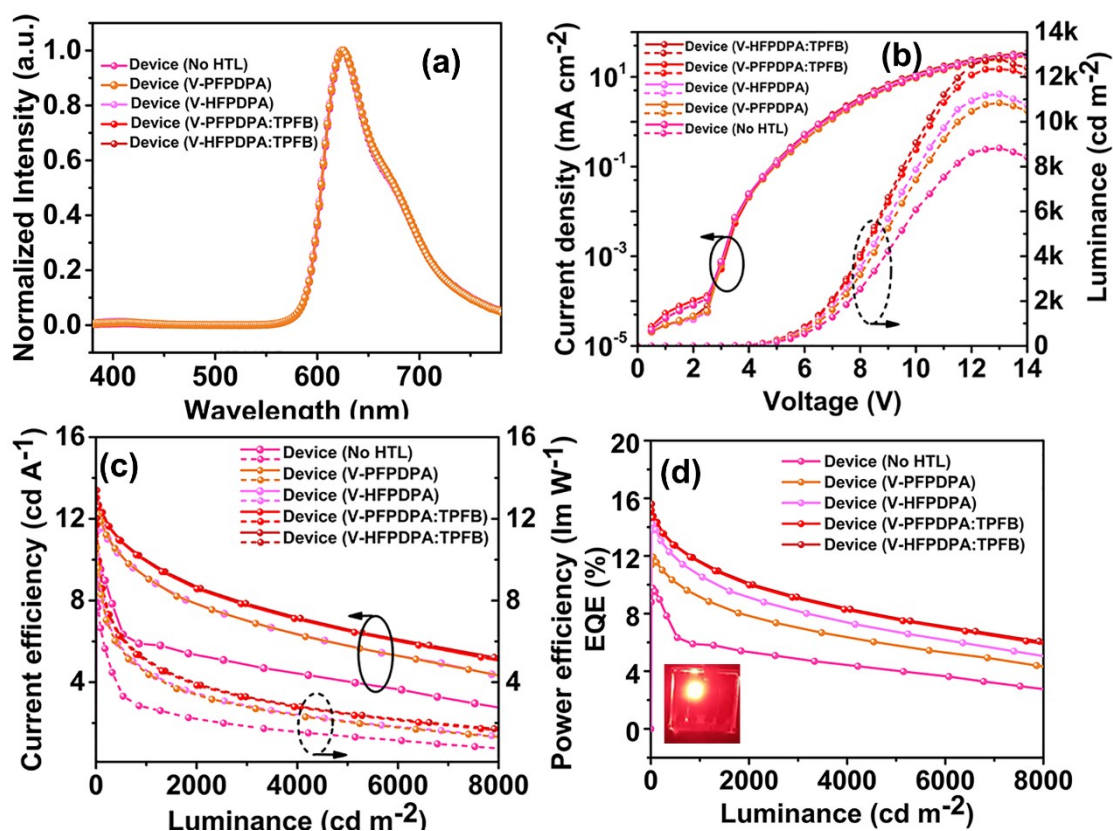

Fig. S26 (a) Normalized EL spectra of red PHOLEDs; (b) Current density ( $J$ )–voltage ( $V$ )–luminance ( $L$ ) curves; (c) current efficiency (CE)– $L$ –power efficiency (PE) curves; and (d) EQE– $L$  curves of red PHOLEDs (insert: device photo at 10 V).

**Table S2** Performance of solution-processed red PHOLEDs

| Device | HTL           | V <sub>on</sub> <sup>a</sup><br>(V) | CE / PE / EQE<br>(cd A <sup>-1</sup> / lm W <sup>-1</sup> / %) |                            | CIE <sup>b</sup> (x, y) |
|--------|---------------|-------------------------------------|----------------------------------------------------------------|----------------------------|-------------------------|
|        |               |                                     | maximum                                                        | at 1000 cd m <sup>-2</sup> |                         |
|        |               |                                     |                                                                |                            |                         |
| R1     | -             | 3.3                                 | 9.76 / 7.90 / 11.41                                            | 5.85 / 2.91 / 5.86         | (0.67, 0.32)            |
| R2     | V-PFPDPA      | 3.2                                 | 11.39 / 10.23 / 11.92                                          | 9.13 / 4.58 / 9.16         | (0.67, 0.32)            |
| R3     | V-HFPDPA      | 3.2                                 | 11.81 / 10.60 / 13.75                                          | 9.14 / 4.47 / 10.64        | (0.67, 0.32)            |
| R4     | V-PFPDPA:TPFB | 3.1                                 | 13.03 / 11.70 / 15.18                                          | 9.92 / 5.05 / 11.55        | (0.67, 0.32)            |
| R5     | V-HFPDPA:TPFB | 3.1                                 | 13.40 / 12.02 / 15.60                                          | 9.98 / 5.12 / 10.30        | (0.67, 0.32)            |

a: measured at 1 cd m<sup>-2</sup>.

b: measured at 6 V.

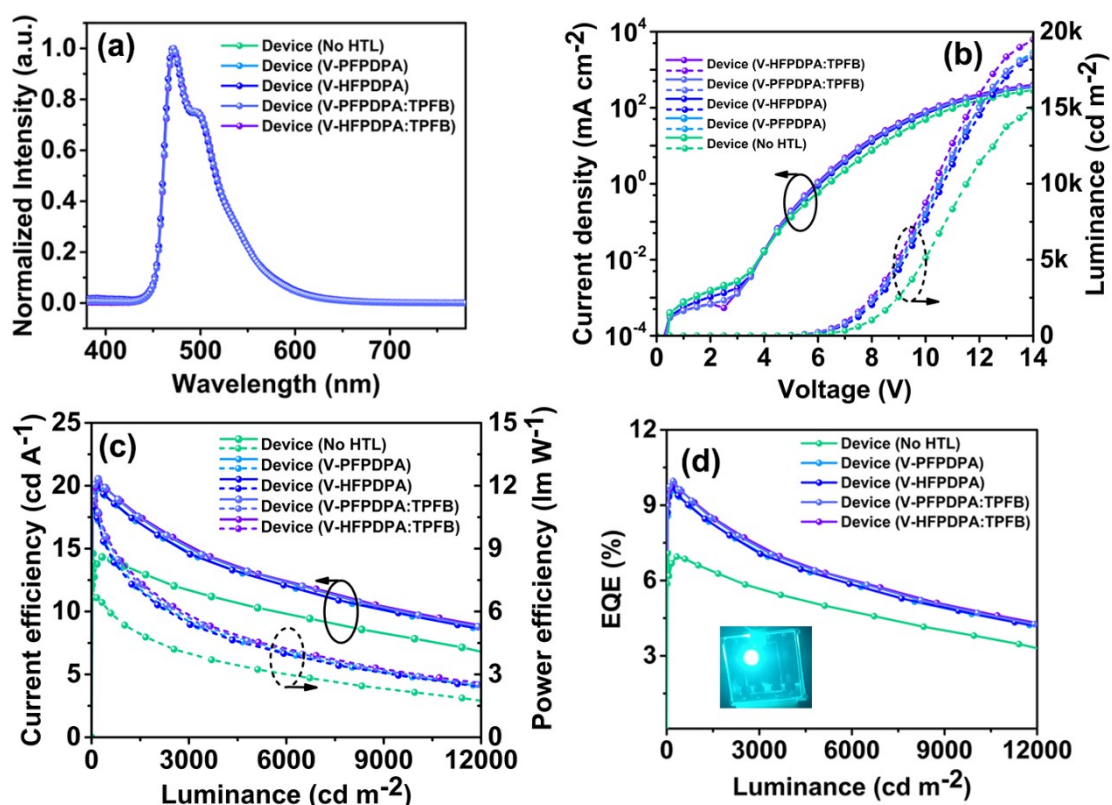

**Fig. S27** (a) Normalized EL spectra of blue PHOLEDs; (b) Current density ( $J$ )–voltage ( $V$ )–luminance ( $L$ ) curves; (c) current efficiency (CE)– $L$ –power efficiency (PE) curves; and (d) EQE– $L$  curves of blue PHOLEDs (insert: device photo at 10 V).

**Table S3** Performance of solution-processed blue PHOLEDs

| Device | HTL           | $V_{\text{on}}^{\text{a}}$<br>(V) | CE / PE / EQE<br>( $\text{cd A}^{-1}/\text{lm W}^{-1} / \%$ ) |                            | CIE <sup>b</sup> (x, y) |
|--------|---------------|-----------------------------------|---------------------------------------------------------------|----------------------------|-------------------------|
|        |               |                                   | maximum                                                       | at 1000 $\text{cd m}^{-2}$ |                         |
|        |               |                                   |                                                               |                            |                         |
| B1     | -             | 4.6                               | 14.60 / 8.34 / 7.08                                           | 13.64 / 5.38 / 6.87        | (0.16, 0.35)            |
| B2     | V-PFPDPA      | 4.5                               | 19.74 / 11.09 / 9.40                                          | 17.97 / 7.86 / 8.72        | (0.16, 0.35)            |
| B3     | V-HFPDPA      | 4.5                               | 19.98 / 11.00 / 9.34                                          | 17.94 / 7.83 / 8.70        | (0.16, 0.35)            |
| B4     | V-PFPDPA:TPFB | 4.5                               | 20.39 / 11.73 / 9.59                                          | 18.56 / 8.14 / 9.00        | (0.16, 0.35)            |
| B5     | V-HFPDPA:TPFB | 4.5                               | 20.54 / 11.61 / 9.74                                          | 18.51 / 8.15 / 8.98        | (0.16, 0.35)            |

a: measured at 1  $\text{cd m}^{-2}$ .

b: measured at 6 V.
